# Supplementary material
Source: Springer Nature journal article supplement (https://www.springermedizin.de/resource/supplementary/13019_2014_1478_MOESM4_ESM.pdf/9640532)

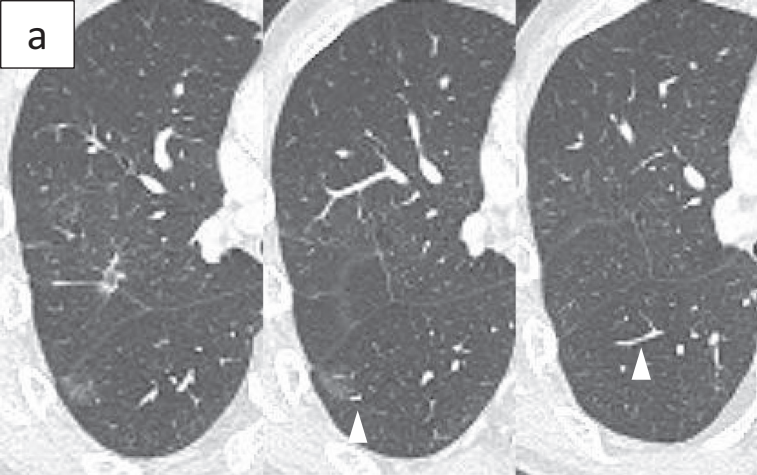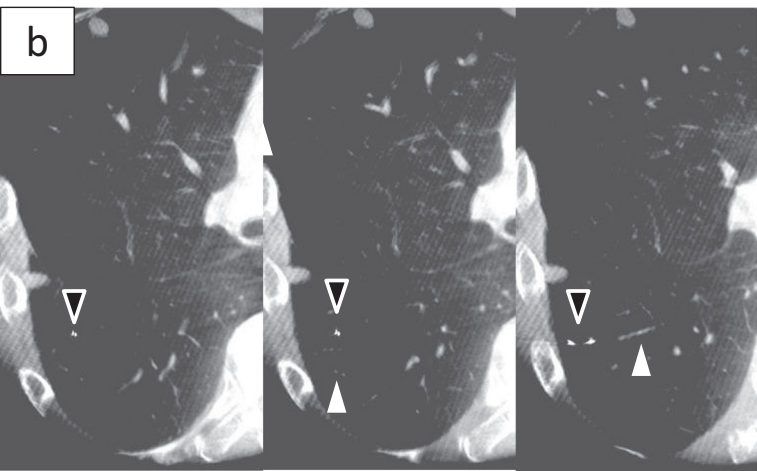

Supplement: MOESM4 [file 9640532]
